# Supplementary material
Source: PubMed Central journal article supplement (PMC6372372)

**Supplemental Figure 1. Temporal distribution of imaging studies performed prior to neck dissection.**

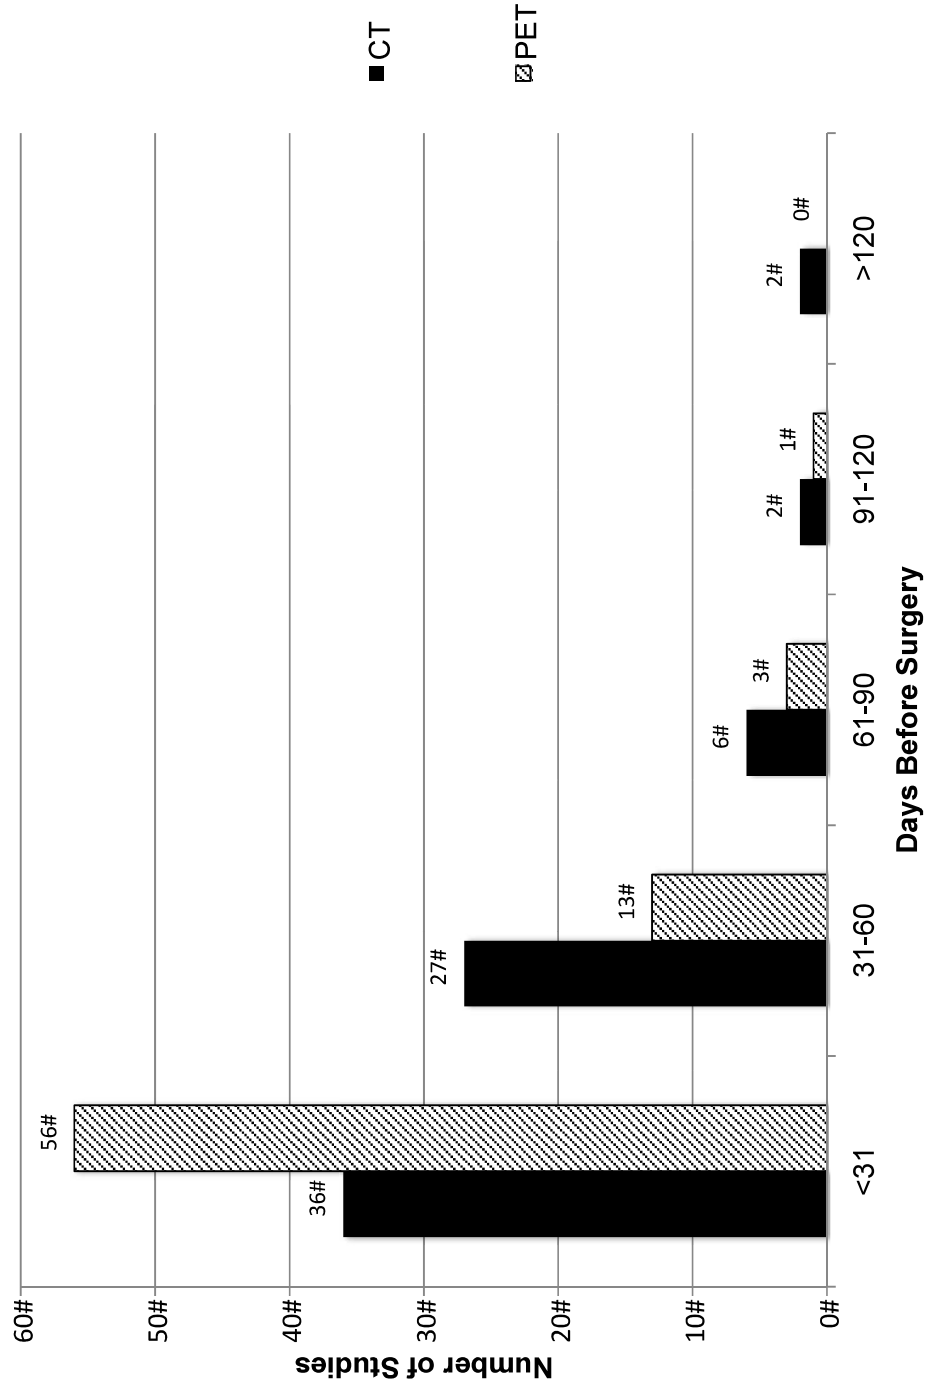

Supplement: NIHMS1000398-supplement-1.pdf [file NIHMS1000398-supplement-1.pdf]
